# Supplementary material
Source: PubMed Central journal article supplement (PMC2765164)
Supplement: 0909733106_0909733106SI.pdf [file 0909733106_0909733106SI.pdf]

# Supporting Information

So et al. 10.1073/pnas.0909733106

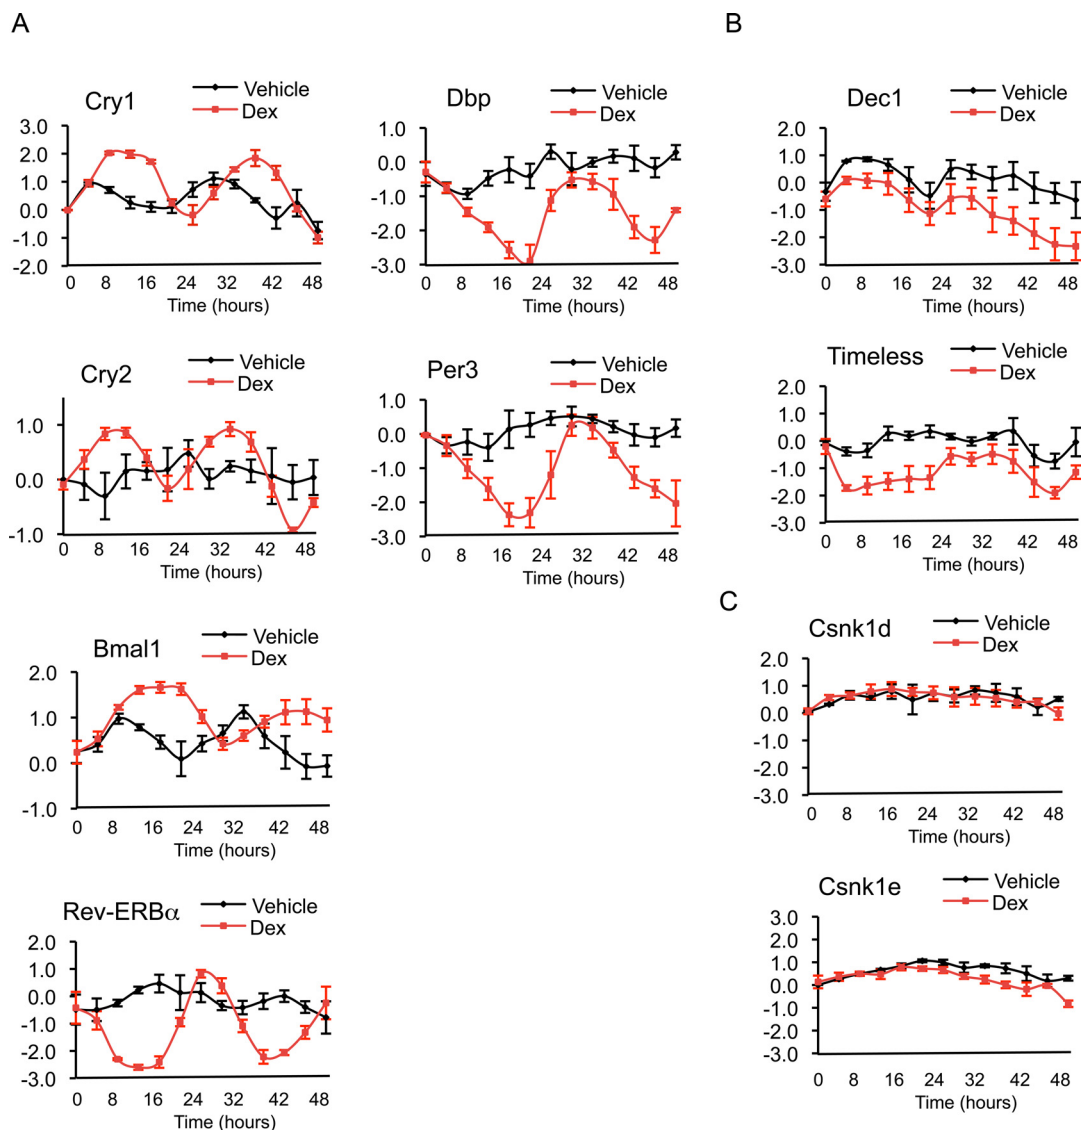

**Fig. S1.** Dex response of clock genes (red) compared with vehicle-treated cells (black). (A) Dex induces synchronized cycling of multiple clock genes. Some clock genes are regulated by dex, but the expression level does not cycle (B), whereas a couple of clock genes were not responsive to dex (C). Transcript levels from 3 independent experiments were measured by quantitative PCR (mean  $\pm$  SEM).
